# Supplementary material for: Land–Water Boundary Treatment for a Tsunami Model With Dimensional Splitting
Source: Springer Nature journal article supplement (doi:10.1007/s00024-014-0825-8), 2014-03-31
Supplement: 24_2014_825_MOESM1_ESM.pdf [file 24_2014_825_MOESM1_ESM.pdf]

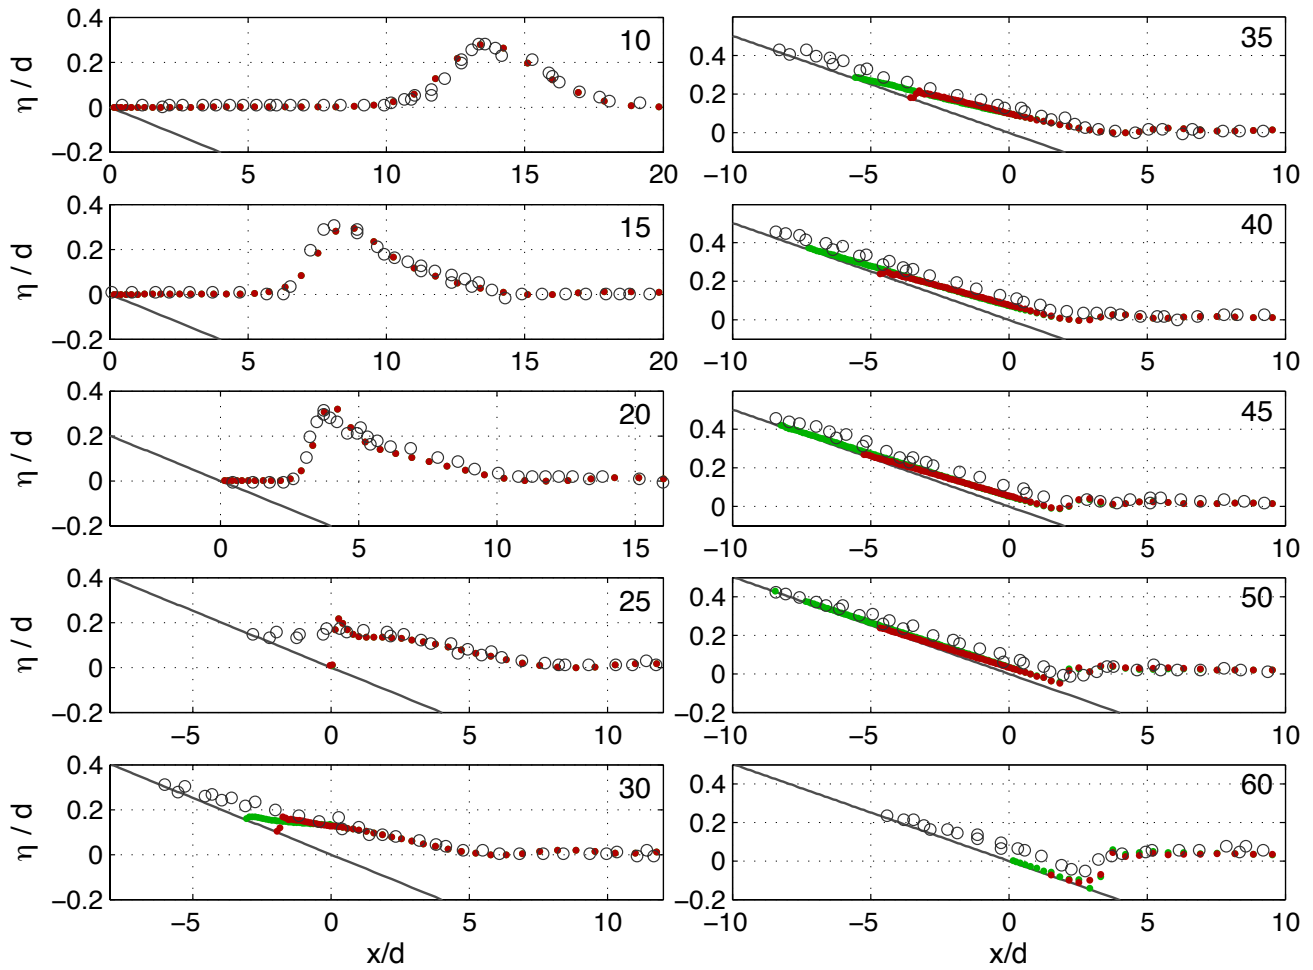

Figure 15: Water surface profiles for an initial solitary wave  $0.3d$  high climbing up a  $1:19.85$  beach at different  $t/\tau$  (as written in a plot). MOST numerical solution (red) is plotted atop Cliffs solution (green), gray circles - measurements.
